# Supplementary material
Source: PubMed Central journal article supplement (PMC5821544)
Supplement: NIHMS934404-supplement-Supp_Mat.pdf [file NIHMS934404-supplement-Supp_Mat.pdf]

## **Supplemental Appendix S1: Applied Pain Treatment Skills Prescription and Script**

Prescription label: Oxycodone/Acetaminophen 2.5mg/325mg

Give 3.5mL (or 2 tablets) by mouth every 4 hours as needed for pain.

Do not give more than 5 doses in 24 hours unless directed by a doctor.

Script: Please imagine that your child has been prescribed this medicine for his or her pain.

Using this container, I would like you to show me how you might use this medicine on a day your child is having pain. Imagine that it is 8am and your child is having pain. Please show me how much liquid (how many pills) of this medication you would give your child at 8am by placing the liquid (pill) into the box. If your child were still in pain after taking this dose of medicine, when could you give him or her this medicine again? Show me at what time and how much liquid (how many pills) of this medicine you would give for the next dose.”\*

\*Repeat the final two prompts until reaching 24 hours or until the parent said that he or she would not give any additional liquid (pill) medication.
